# Supplementary material for: Combinative effects of Azospirillum brasilense inoculation and chemical priming on germination behavior and seedling growth in aged grass seeds
Source: PubMed Central journal article supplement (PMC6504077; doi:10.1371/journal.pone.0210453), 2019-05-07
Supplement: pone.0210453.s001.pdf [file pone.0210453.s001.pdf]

*Supplementary Material S1*

**Combinative effects of *Azospirillum brasilense*  
inoculation and chemical priming on germination  
behavior and seedling growth in aged grass seeds**

**Xu Liu<sup>\*</sup>, Zhao Chen<sup>1</sup>, Yan Gao<sup>1</sup>, Qian Liu<sup>1</sup>, Wennan Zhou<sup>1</sup>, Tian Zhao<sup>1</sup>, Wenbo Jiang<sup>1</sup>, Xuewen Cui<sup>1</sup>, Jian Cui<sup>2</sup> and Quanzhen Wang<sup>1</sup>**

**\*Correspondence:** Quanzhen Wang: wangquanzhen191@163.com

**Table A.** The MDA content and the activity of SOD and POD in tall fescue 2015, 2014, orchardgrass 2013 and Russian wild rye 2009.

| <b>Species</b>       | <b>MDA</b><br>( $\mu\text{mol g}^{-1}$ FW) | <b>SOD</b><br>(U/g.FW/h)       | <b>POD (0.000)</b><br>(U/g.FW/min) |
|----------------------|--------------------------------------------|--------------------------------|------------------------------------|
| Tall fescue 2015     | 13.80 $\pm$ 5.22 <sup>b</sup>              | 17.06 $\pm$ 8.83 <sup>b</sup>  | 1.62 $\pm$ 0.49 <sup>c</sup>       |
| Tall fescue 2014     | 9.94 $\pm$ 0.22 <sup>b</sup>               | 12.20 $\pm$ 8.21 <sup>b</sup>  | 1.33 $\pm$ 0.64 <sup>c</sup>       |
| Orchardgrass 2013    | 11.01 $\pm$ 2.43 <sup>b</sup>              | 25.63 $\pm$ 14.24 <sup>a</sup> | 3.17 $\pm$ 1.18 <sup>a</sup>       |
| Russian wildrye 2009 | 37.76 $\pm$ 9.73 <sup>a</sup>              | 5.43 $\pm$ 14.32 <sup>c</sup>  | 2.37 $\pm$ 0.78 <sup>b</sup>       |

<sup>†</sup>Data are the mean  $\pm$ SD.

<sup>‡</sup>Means followed by different letters are significantly different at  $P < 0.05$ .

**Table B.** Canonical response surface analysis for germination percentage, germination index, seed vigor index, root, shoot and seedling length, ratio of S/R, MDA content, the activity of SOD, POD, CAT and APX of the seedlings based on coded data.

| Variable                    | Critical value of bacteria ( $X_1$ ) | Critical value of time ( $X_3$ ) | F Value | Pr>F   | Estimate d value | Stationary point |
|-----------------------------|--------------------------------------|----------------------------------|---------|--------|------------------|------------------|
| <b>Tall fescue 2015</b>     |                                      |                                  |         |        |                  |                  |
| Germination percentage      | 50.6                                 | 19.1                             | 3.04    | 0.036  |                  | minimum          |
| Germination index           | 50.1                                 | 20.5                             | 2.87    | 0.036  |                  | saddle point     |
| Seed vigor index            | 63.2                                 | 6.9                              | 3.08    | 0.028  |                  | maximum          |
| Root length                 | 49.7                                 | 16.4                             | 2.31    | 0.076  |                  | maximum          |
| Ratio of shoot to root      | 54.7                                 | 17.5                             | 3.48    | 0.017  |                  | minimum          |
| SOD activity                | 38.2                                 | 7.4                              | 2.77    | 0.041  |                  | saddle point     |
| MDA content                 | 55.8                                 | 18.0                             | 3.31    | 0.020  |                  | saddle point     |
| CAT content                 | 49.5                                 | 24.8                             | 9.31    | <.0001 |                  | saddle point     |
| APX activity                | 52.1                                 | 15.6                             | 4.21    | 0.007  |                  | minimum          |
| <b>Tall fescue 2014</b>     |                                      |                                  |         |        |                  |                  |
| Seed vigor index            | 65.4                                 | 11.6                             | 2.68    | 0.047  |                  | maximum          |
| Root length                 | 59.0                                 | 16.0                             | 5.76    | 0.001  |                  | saddle point     |
| Seedling length             | 51.0                                 | 26.3                             | 4.42    | 0.005  |                  | maximum          |
| Ratio of shoot to root      | 41.0                                 | 32.0                             | 7.77    | <.0001 |                  | minimum          |
| MDA content                 | 52.8                                 | 19.1                             | 6.73    | <.0001 |                  | saddle point     |
| <b>Orchardgrass 2013</b>    |                                      |                                  |         |        |                  |                  |
| Germination index           | 51.1                                 | 14.4                             | 3.19    | 0.024  |                  | saddle point     |
| Seed vigor index            | 48.6                                 | 13.8                             | 2.965   | 0.032  |                  | saddle point     |
| Root length                 | 45.4                                 | 5.9                              | 3.51    | 0.016  |                  | maximum          |
| Seedling length             | 55.7                                 | 6.2                              | 2.95    | 0.032  |                  | maximum          |
| Ratio of shoot to root      | 52.9                                 | 5.7                              | 5.73    | 0.001  |                  | minimum          |
| SOD activity                | 53.1                                 | 13.9                             | 10.72   | <.0001 |                  | saddle point     |
| POD activity                | 23.5                                 | 20.0                             | 6.84    | <.0001 |                  | saddle point     |
| CAT content                 | 41.3                                 | 12.2                             | 7.89    | <.0001 |                  | saddle point     |
| APX activity                | 19.6                                 | 44.9                             | 7.00    | 0.0002 |                  | saddle point     |
| <b>Russian wildrye 2009</b> |                                      |                                  |         |        |                  |                  |
| Germination percentage      | 57.8                                 | 13.0                             | 9.30    | <.0001 |                  | saddle point     |
| Germination index           | 52.5                                 | 14.4                             | 3.19    | 0.024  |                  | saddle point     |
| Seed vigor index            | 54.2                                 | 9.2                              | 4.46    | 0.005  |                  | maximum          |
| Root length                 | 52.9                                 | 20.0                             | 3.15    | 0.025  |                  | maximum          |
| Shoot length                | 55.5                                 | 17.3                             | 5.58    | 0.0015 |                  | maximum          |
| Seedling length             | 53.8                                 | 18.0                             | 5.516   | 0.0016 |                  | maximum          |
| POD activity                | 61.1                                 | 3.9                              | 2.82    | 0.038  |                  | maximum          |
| MDA content                 | 52.8                                 | 19.2                             | 7.44    | 0.0008 |                  | minimum          |
| CAT content                 | 47.6                                 | 19.4                             | 4.53    | 0.005  |                  | saddle point     |

**Table C.** Pearson correlation coefficients for activity of SOD, APX, POD, CAT, and MDA content.

|                        | Germination percentage | Root length | SOD     | APX      | POD      | CAT      | MDA      |
|------------------------|------------------------|-------------|---------|----------|----------|----------|----------|
| Germination percentage | 1                      | 0.323**     | 0.419** | -0.378** | -0.262** | -0.140   | -0.519** |
| Root length            |                        | 1           | 0.212** | -0.445** | -0.447** | -0.194** | -0.450** |
| SOD                    |                        |             | 1       | -0.262** | -0.041   | 0.045    | -0.249** |
| APX                    |                        |             |         | 1        | 0.452**  | 0.165    | 0.373**  |
| POD                    |                        |             |         |          | 1        | 0.119    | 0.383**  |
| CAT                    |                        |             |         |          |          | 1        | 0.216*   |
| MDA                    |                        |             |         |          |          |          | 1        |

\*Significant at the 0.05 probability level.

\*\*Significant at the 0.01 probability level.
